# Supplementary material for: Classification of HIV-1 Sequences Using Profile Hidden Markov Models
Source: PubMed Central journal article supplement (PMC3356369; doi:10.1371/journal.pone.0036566), 2012-05-18

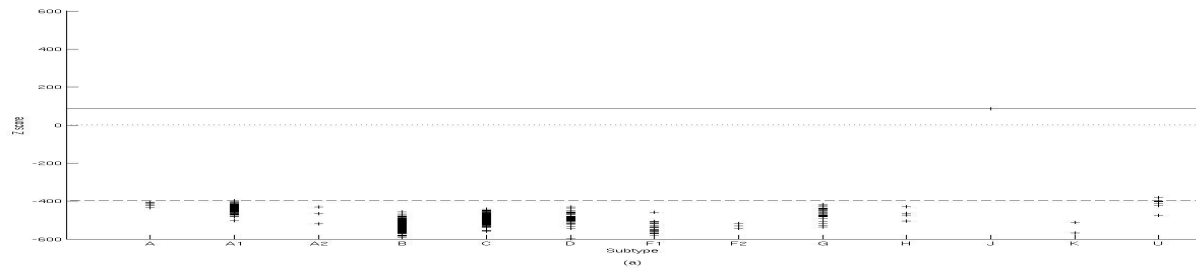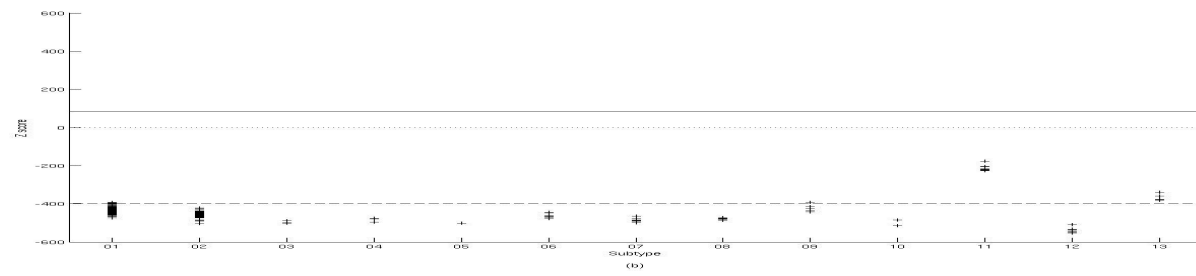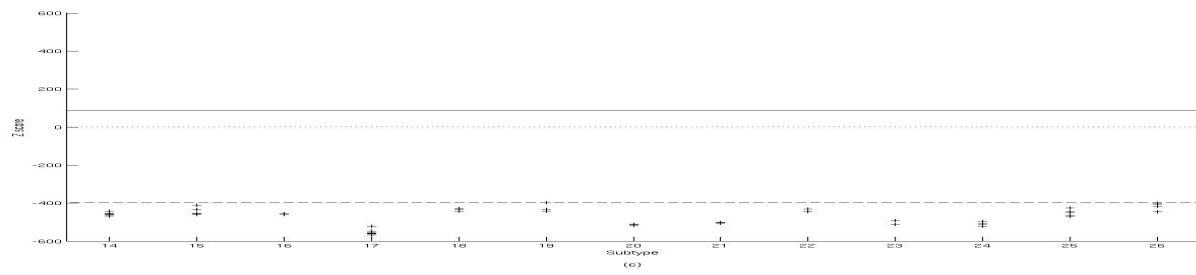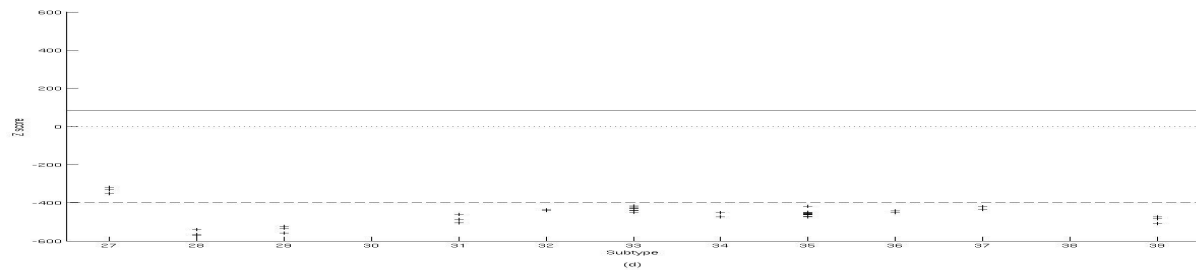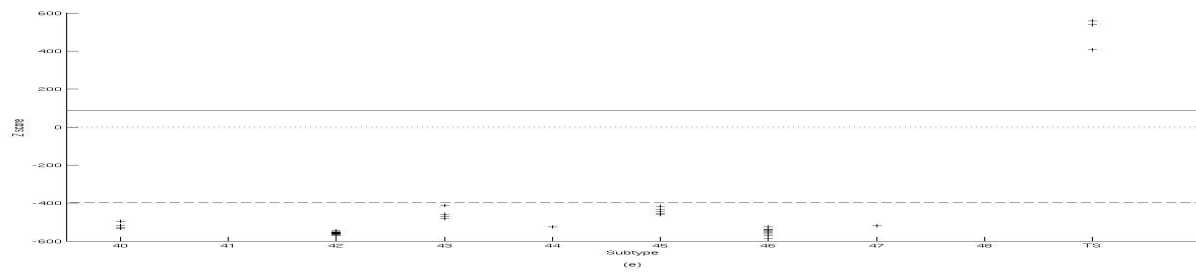

Supplement: pone.0036566.s011.pdf [file pone.0036566.s011.pdf]
