# Supplementary material for: Classification of HIV-1 Sequences Using Profile Hidden Markov Models
Source: PubMed Central journal article supplement (PMC3356369; doi:10.1371/journal.pone.0036566), 2012-05-18
Supplement: pone.0036566.s029.pdf [file pone.0036566.s029.pdf]

**Table S2:** Accession numbers of sequences making up the positive training set for sub-type H and J when the *gag-pol* region is used for classification. Since there are only 4 sequences of the *gag-pol* region for H and 3 for J, 3 of the 4 sequences of H and 2 of the 3 sequences of J were used to build the respective pHMMs which were then successful in classifying the remaining sequences.

| <b>H</b> | <b>J</b> |
|----------|----------|
| AF005496 | AF082394 |
| AF190127 | GU237072 |
| AF190128 |          |
