# Supplementary material for: Classification of HIV-1 Sequences Using Profile Hidden Markov Models
Source: PubMed Central journal article supplement (PMC3356369; doi:10.1371/journal.pone.0036566), 2012-05-18
Supplement: pone.0036566.s031.pdf [file pone.0036566.s031.pdf]

**Table S4:** Accession numbers of sequences making up the negative training set for sub-type D when the *gag-pol* region is used for classification.

| <b>Subtype</b> | <b>Accession Number</b> |
|----------------|-------------------------|
| A1             | AB253422                |
| A2             | AF286238                |
| B              | AB565496                |
| B              | AF042102                |
| B              | AB480696                |
| B              | AF538305                |
| B              | AB485642                |
| B              | AF049495                |
| C              | AB254141                |
| C              | AB485645                |
| F1             | AB485656                |
| F2             | AJ249237                |
| G              | AB485662                |
| G              | AY586548                |
| H              | AF005496                |
| H              | FJ711703                |
| J              | AF082394                |
| J              | GU237072                |
| K              | AJ249235                |
| K              | AJ249239                |
