# Supplementary material for: Classification of HIV-1 Sequences Using Profile Hidden Markov Models
Source: PubMed Central journal article supplement (PMC3356369; doi:10.1371/journal.pone.0036566), 2012-05-18
Supplement: pone.0036566.s032.pdf [file pone.0036566.s032.pdf]

**Table S5:** Number of sequences making up the positive training set used for determining whether a given sub-type (X) is present in the *gag-pol* region of a CRF.

| <b>Subtype(X)</b> | <b>Number of Sequences</b> | <b>Accession Numbers</b>                                                                                                                                                                                                                                                                                             |
|-------------------|----------------------------|----------------------------------------------------------------------------------------------------------------------------------------------------------------------------------------------------------------------------------------------------------------------------------------------------------------------|
| A                 | 6                          | AM000053, AM000054, AB098330, AB253421, AF286237, AF286238                                                                                                                                                                                                                                                           |
| B                 | 31                         | AB097870, AB221126, AB287364, AB287366, AB287371, AB289590, AB428557, AB480693, AB480697, AB564745, AB565498, AF004394, AF042101, AF049495, AF256205, AY173952, AY173956, AY275556, AY314045, AY314051, AY314058, AY331285, AY331297, AY423387, AY779552, AY818644, AY835754, AY835762, AY835771, AY839827, AB604949 |
| C                 | 16                         | AF286233, AF443087, AF110966, AY878056, AF443076, AF443094, AY585266, AF443111, AY228556, AY463227, AY043175, AY772693, AB254144, AB254153, AF110978, AF067154                                                                                                                                                       |
| D                 | 14                         | A14116, A34828, AB485648, AB485650, AF133821, AJ488926, AJ519489, AY773338, AY773339, AY773340, EF633445, FJ388945, U88822, U88824                                                                                                                                                                                   |
| F                 | 10                         | AB480298, AB485657, AB485658, AF075703, AF077336, DQ189088, DQ979023, DQ979024, AJ249236, AJ249237                                                                                                                                                                                                                   |
| G                 | 6                          | AB287003, AB485663, AF423760, AY586548, AY612637, FJ389364                                                                                                                                                                                                                                                           |
| H                 | 4                          | AF190127, FJ711703, AF005496, AF190128                                                                                                                                                                                                                                                                               |
| J                 | 3                          | GU237072, AF082394, AF082395                                                                                                                                                                                                                                                                                         |
