# Supplementary material for: Classification of HIV-1 Sequences Using Profile Hidden Markov Models
Source: PubMed Central journal article supplement (PMC3356369; doi:10.1371/journal.pone.0036566), 2012-05-18
Supplement: pone.0036566.s034.pdf [file pone.0036566.s034.pdf]

**Table S7:** Accession numbers of sequences making up the positive training set for all subtypes, except H and J, when the *env* region is used for classification.

| <b>A</b> | <b>B</b> | <b>C</b> | <b>D</b> | <b>F</b> | <b>G</b> |
|----------|----------|----------|----------|----------|----------|
| AM000053 | AB428560 | AF286228 | AY773340 | GQ290462 | AB287003 |
| AM000054 | AB287370 | AB254150 | AJ519489 | AF075703 | AF423760 |
| AF286237 | AB286956 | AF110963 | AB485650 | DQ189088 | AY612637 |
| AF286238 | AB480698 | AB097871 | DQ054367 | AB485659 | AY586548 |
| AB098330 | AB097870 | AB485645 | A14116   | AJ249238 | FJ389364 |
| AB253421 | AB289589 | AF110974 | U88822   | DQ979025 | AB485663 |
