# Supplementary material for: Classification of HIV-1 Sequences Using Profile Hidden Markov Models
Source: PubMed Central journal article supplement (PMC3356369; doi:10.1371/journal.pone.0036566), 2012-05-18
Supplement: pone.0036566.s035.pdf [file pone.0036566.s035.pdf]

**Table S8:** Accession numbers of sequences making up the negative training set for all subtypes, except H and J, when the *env* region is used for classification.

| <b>Sub-type</b> | <b>Accession numbers</b> |
|-----------------|--------------------------|
| C               | AB254141                 |
| C               | AB485645                 |
| H               | AF005496                 |
| H               | FJ711703                 |
| G               | AB485662                 |
| G               | AY586548                 |
| A1              | AB253422                 |
| A2              | AF286238                 |
| D               | A34828                   |
| D               | AY773340                 |
| B               | A04321                   |
| B               | AB287372                 |
| K               | AJ249235                 |
| K               | AJ249239                 |
| F1              | AB485656                 |
| F2              | AJ249237                 |
| J               | AF082394                 |
| J               | GU237072                 |
