# Supplementary material for: Classification of HIV-1 Sequences Using Profile Hidden Markov Models
Source: PubMed Central journal article supplement (PMC3356369; doi:10.1371/journal.pone.0036566), 2012-05-18
Supplement: pone.0036566.s036.pdf [file pone.0036566.s036.pdf]

**Table S9:** Accession numbers of sequences making up the positive training set for sub-type H and J when the *env* region is used for classification. Since there are only 4 sequences of the *env* region for both H and J, three were used to build the pHMM which was then successful in classifying the remaining sequence. Note that a choice of *any* 3 of the 4 *env* sequences can be used to build a pHMM which can successfully classify the remaining one.

| <b>H</b> | <b>J</b> |
|----------|----------|
| AF190127 | EF614151 |
| AF005496 | AF082394 |
| AF190128 | AF082395 |
