# Supplementary material for: Classification of HIV-1 Sequences Using Profile Hidden Markov Models
Source: PubMed Central journal article supplement (PMC3356369; doi:10.1371/journal.pone.0036566), 2012-05-18
Supplement: pone.0036566.s038.pdf [file pone.0036566.s038.pdf]

**Table S11:** Accession numbers of sequences making up the negative training set for sub-type J when the *env* region is used for classification.

| <b>Sub-type</b> | <b>Accession Number</b> |
|-----------------|-------------------------|
| C               | AB254141                |
| C               | AB485645                |
| H               | AF005496                |
| H               | FJ711703                |
| G               | AB485662                |
| G               | AY586548                |
| A1              | AB253422                |
| A2              | AF286238                |
| D               | A34828                  |
| D               | AY773340                |
| B               | A04321                  |
| B               | AB287372                |
| K               | AJ249235                |
| K               | AJ249239                |
| F1              | AB485656                |
| F2              | AJ249237                |
