# Supplementary material for: Classification of HIV-1 Sequences Using Profile Hidden Markov Models
Source: PubMed Central journal article supplement (PMC3356369; doi:10.1371/journal.pone.0036566), 2012-05-18
Supplement: pone.0036566.s039.pdf [file pone.0036566.s039.pdf]

**Table S12:** Thresholds for detection of sub-types in the *gag-pol* region of CRF strains.

| <b>Sub-Type</b> | <b>Tp</b> | <b>Tn</b> |
|-----------------|-----------|-----------|
| A               | 119.7     | -226.9    |
| B               | 78.6      | -195.1    |
| C               | 104.4     | -365.5    |
| D               | 82.2      | -144.2    |
| F               | 63.9      | -164.2    |
| G               | 173.6     | -340.6    |
| H               | 443.1     | -299.3    |
| J               | 85.7      | -398.0    |
