# Supplementary material for: Classification of HIV-1 Sequences Using Profile Hidden Markov Models
Source: PubMed Central journal article supplement (PMC3356369; doi:10.1371/journal.pone.0036566), 2012-05-18
Supplement: pone.0036566.s040.pdf [file pone.0036566.s040.pdf]

**Table S13:** Number of sequences making up the positive training set used for determining whether a given sub-type (X) is present in the *env* region of a CRF.

| <b>Subtype(X)</b> | <b>Number of Sequences</b> |
|-------------------|----------------------------|
| A                 | 12                         |
| B                 | 30                         |
| C                 | 10                         |
| D                 | 20                         |
| F                 | 12                         |
| G                 | 12                         |
| H                 | 4                          |
| J                 | 4                          |
