# Supplementary material for: Classification of HIV-1 Sequences Using Profile Hidden Markov Models
Source: PubMed Central journal article supplement (PMC3356369; doi:10.1371/journal.pone.0036566), 2012-05-18
Supplement: pone.0036566.s042.pdf [file pone.0036566.s042.pdf]

**Table S15:** Thresholds for detection of sub-types in the *env* region of CRF strains.

| <b>Sub-Type</b> | <b>Tp</b> | <b>Tn</b> |
|-----------------|-----------|-----------|
| A               | 84.8      | -119.5    |
| B               | 95.1      | -129.9    |
| C               | 112.5     | -317.4    |
| D               | 67.7      | -155.6    |
| F               | 181.1     | -120.2    |
| G               | 161.7     | -177.6    |
| H               | 415.0     | -275.3    |
| J               | 325.7     | -268.6    |
