# Supplementary material for: Classification of HIV-1 Sequences Using Profile Hidden Markov Models
Source: PLoS One. 2012 May 18;7(5):e36566. doi: 10.1371/journal.pone.0036566 (PMC3356369; doi:10.1371/journal.pone.0036566)
Supplement: Table S14 — Number of sequences of each sub-type making up the negative training set used for determining whether a given sub-type (X) is present in the env region of a CRF. (PDF) [file pone.0036566.s041.pdf]

**Table S14:** Number of sequences of each sub-type making up the negative training set used for determining whether a given sub-type (X) is present in the *env* region of a CRF.

| <b>X=A</b> |     | <b>X=B</b> |     | <b>X=C</b> |     | <b>X=D</b> |     | <b>X=F</b> |     | <b>X=G</b> |     |
|------------|-----|------------|-----|------------|-----|------------|-----|------------|-----|------------|-----|
| subtype    | No. |
| A          | 0   | A          | 2   | A          | 12  | A          | 2   | A          | 2   | A          | 12  |
| B          | 2   | B          | 0   | B          | 2   | B          | 30  | B          | 2   | B          | 2   |
| C          | 12  | C          | 2   | C          | 0   | C          | 2   | C          | 2   | C          | 2   |
| D          | 2   | D          | 28  | D          | 2   | D          | 0   | D          | 2   | D          | 2   |
| F          | 2   | F          | 2   | F          | 8   | F          | 2   | F          | 0   | F          | 2   |
| G          | 6   | G          | 2   | G          | 2   | G          | 2   | G          | 2   | G          | 0   |
| H          | 2   | H          | 2   | H          | 2   | H          | 2   | H          | 2   | H          | 2   |
| J          | 2   | J          | 2   | J          | 2   | J          | 2   | J          | 2   | J          | 2   |
